# Supplementary material
Source: Springer Nature journal article supplement (https://www.springermedizin.de/resource/supplementary/12937_2010_310_MOESM7_ESM.pdf/25654842)
Supplement: MOESM7 [file 25654842]

**Table 7. Fate of Immunomodulatory Polysaccharide Products Following Oral Intake**

| Category                      | Product                                                                                     | Metabolized by human gut bacteria? | Study type      | Fate (method: tissues detected)                                                                                             | References                                        |
|-------------------------------|---------------------------------------------------------------------------------------------|------------------------------------|-----------------|-----------------------------------------------------------------------------------------------------------------------------|---------------------------------------------------|
| Arabinogalactans              | <i>Larix</i> spp.                                                                           | yes                                | <i>in vitro</i> | NA                                                                                                                          | [163-169]                                         |
| Fucoidans                     | <i>Undaria pinnatifida</i>                                                                  | no                                 | <i>in vitro</i> | Ab: human plasma                                                                                                            | [108,170]                                         |
| Galactomannans                | <i>Cyamopsis tetragonolobus</i> (partially hydrolyzed guar gum)                             | yes                                | <i>in vivo</i>  | NA                                                                                                                          | [171]                                             |
|                               | <i>Cyamopsis tetragonolobus</i> (guar gum)                                                  | yes                                | <i>in vitro</i> | NA                                                                                                                          | [167]                                             |
| Glucans                       | <i>Hordeum vulgare</i>                                                                      | NA                                 | <i>in vivo</i>  | Fluorescein-labeled: mouse M $\phi$ in the spleen, bone marrow, lymph nodes                                                 | [73]                                              |
|                               | <i>Laminaria digitata</i> (laminarin)                                                       | yes                                | <i>in vitro</i> | NA                                                                                                                          | [29,170,172]                                      |
|                               | <i>Sclerotium rofsii</i> (scleroglucan) glucan phosphate, <i>Laminaria</i> spp. (laminarin) | NA                                 | <i>in vivo</i>  | Alexa Fluor 488-labeled: mouse intestinal epithelial cells, plasma, GALT                                                    | [29]                                              |
|                               | <i>Saccharomyces cerevisiae</i> (particulate)                                               | NA                                 | <i>in vivo</i>  | Fluorescein-labeled: mouse macrophage in the spleen, bone marrow, lymph nodes                                               | [73]                                              |
|                               | <i>Trametes versicolor</i> (PSK)                                                            | NA                                 | <i>in vivo</i>  | <sup>14</sup> C-labeled: rat and rabbit serum; mouse GI tract, bone marrow, salivary glands, liver, brain, spleen, pancreas | [173]                                             |
| Mannans                       | <i>Aloe barbadensis</i> (aloemannan)                                                        | yes                                | <i>in vitro</i> | FITC-labeled: mouse, GI tract                                                                                               | [121,174]                                         |
|                               | <i>Aloe barbadensis</i> (gel powder)                                                        | yes                                | <i>in vitro</i> | NA                                                                                                                          | [163]                                             |
|                               | <i>Aloe barbadensis</i> (acemannan)                                                         | NA                                 | <i>in vivo</i>  | <sup>14</sup> C-labeled: dog systemic, particularly liver, bone marrow, gut, kidney, thymus, spleen                         | (Carrington Laboratories, personal communication) |
| Mixed polysaccharide products | Ambrotose complex <sup>®</sup> , Advanced Ambrotose <sup>®</sup> powder                     | yes                                | <i>in vitro</i> | NA                                                                                                                          | [163,175]                                         |
| Pectins                       | NA                                                                                          | yes                                | <i>in vitro</i> | NA                                                                                                                          | [165-167,176]                                     |
|                               | <i>Bupleurum falcatum</i> (bupleuran 2IIc)                                                  | NA                                 | <i>in vivo</i>  | Ab bound: mouse Peyer's patch, liver                                                                                        | [109]                                             |
